# Supplementary material for: Selection of Suitable Reference Genes for qPCR Gene Expression Analysis of HepG2 and L02 in Four Different Liver Cell Injured Models
Source: PubMed Central journal article supplement (PMC7376413; doi:10.1155/2020/8926120), 2020-07-14

**S1 Figure Expression stability of the housekeeping genes in L02 evaluated by geNorm M values represent the average expression stability. From left to right, the value of M decreased in turn, indicating the stability gradually increased.**

**Smaller M value means higher stability. The control group, ethanol, hydrogen peroxide, acetaminophen and carbon tetrachloride were abbreviated to WT, EtOH, H2O2, APAP and CCl4 respectively.**

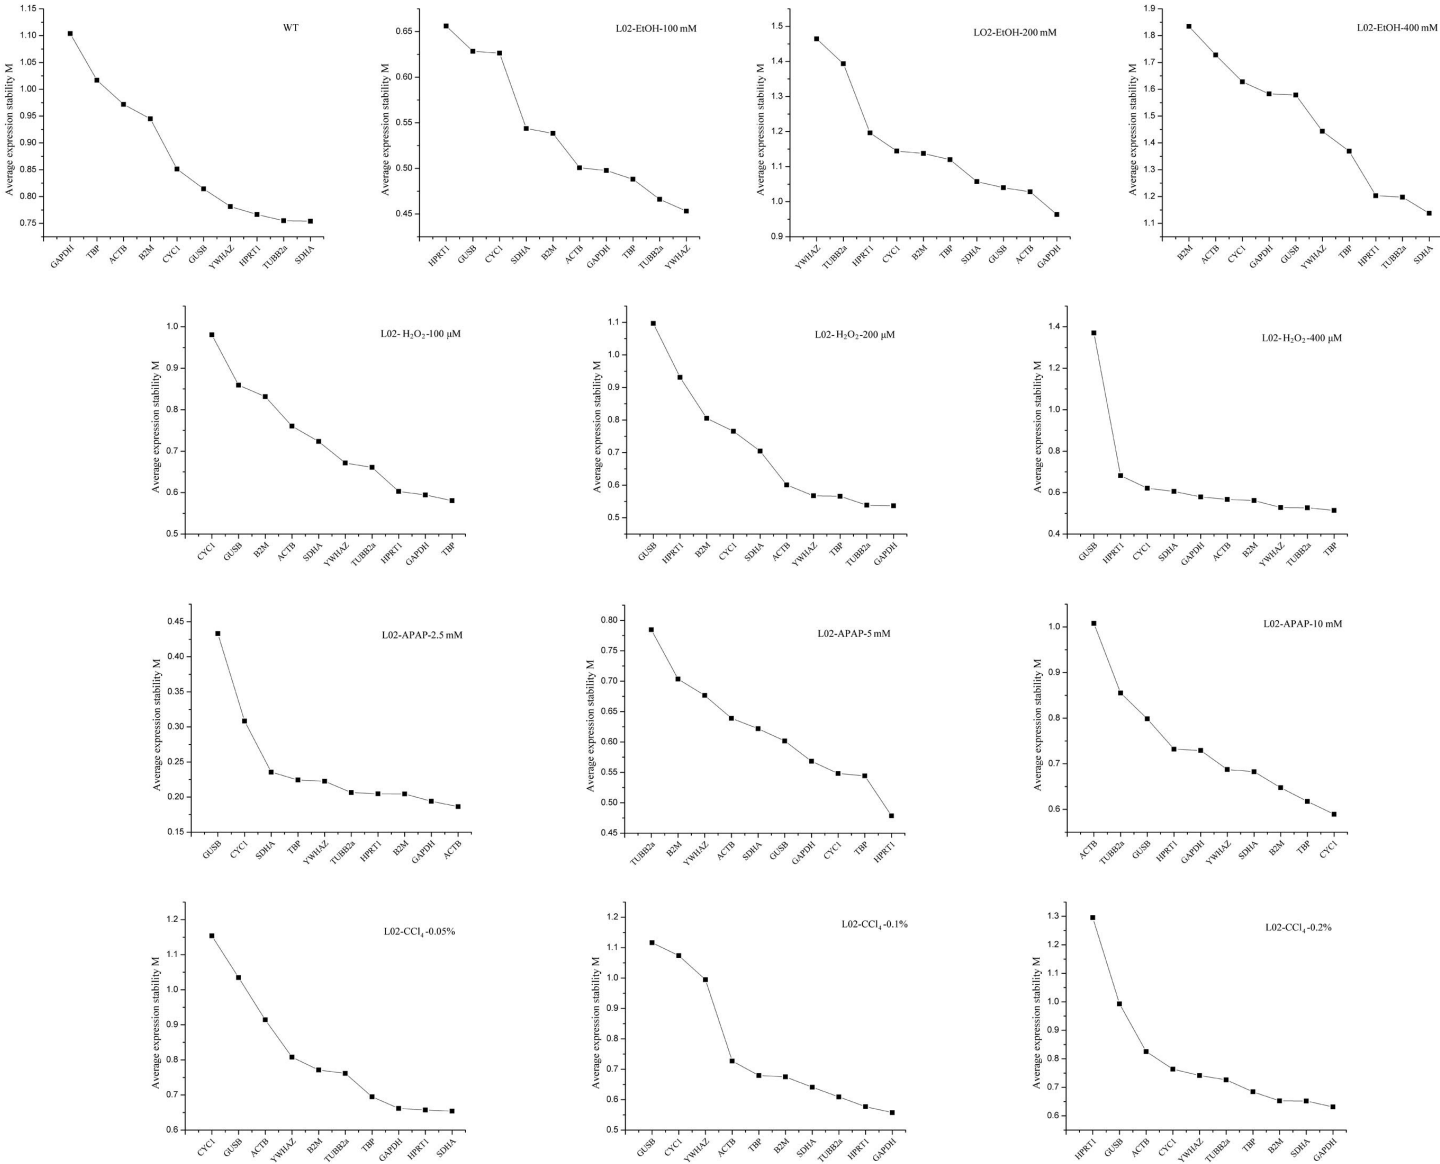

S2 Figure Agarose gel (1%) electrophoresis of the ten candidate housekeeping genes. 1-10 represent ACTB, B2M, GAPDH, TUBB2a, HPRT1, SDHA, TBP, YWHAZ, CYC1 and GUSB, respectively

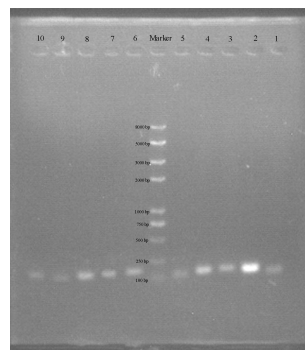

**S3 Figure Melt curves of the ten candidate housekeeping genes.**

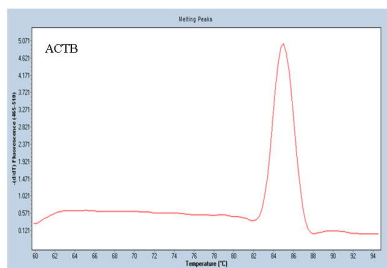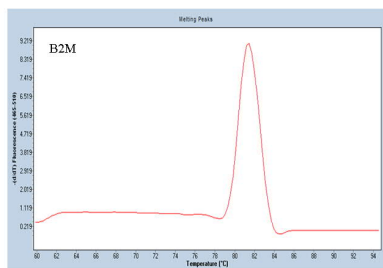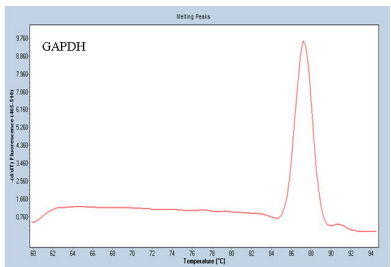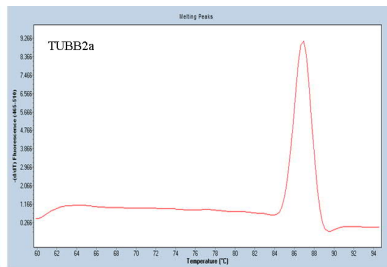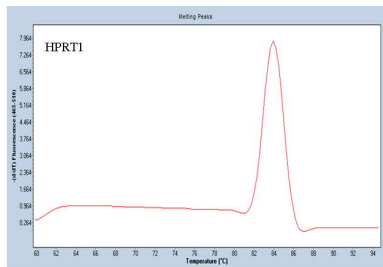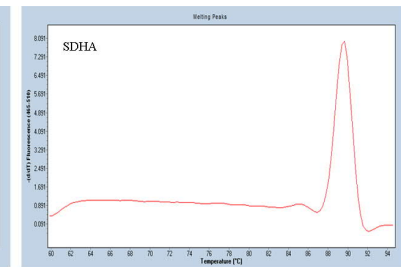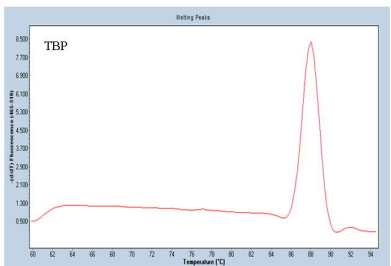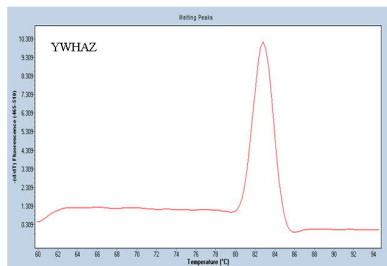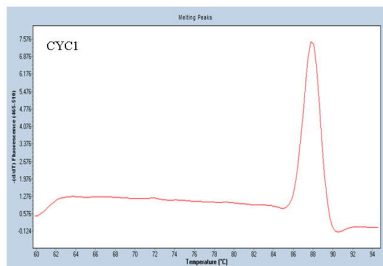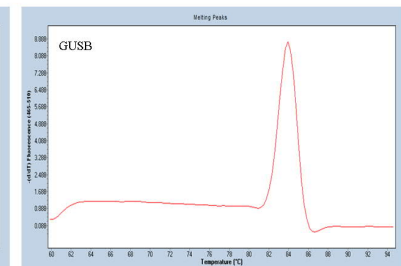

Supplement: 8926120.f1.pdf [file 8926120.f1.pdf]
